# Supplementary material
Source: PubMed Central journal article supplement (PMC3754311)
Supplement: AAC.00513-13_zac999102080so1.pdf [file AAC.00513-13_zac999102080so1.pdf]

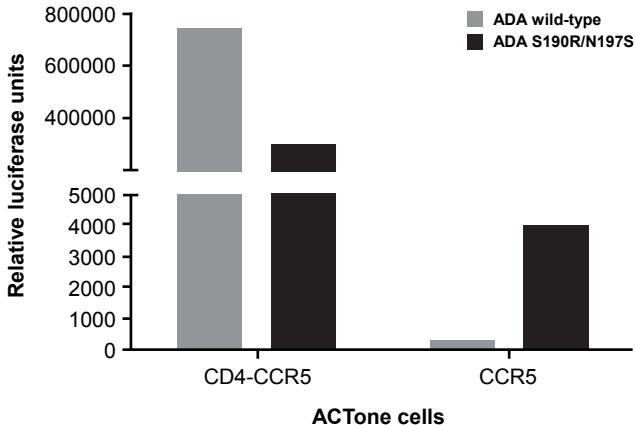

**Supplementary Figure 1.** Entry of ADA wild-type and pseudotype S190R/N197S virus into ACTone cells expressing CD4/CCR5 or CCR5 only. Data are the mean value of two independent experiments.
